# Supplementary material for: Mutations Causing Complex Disease May under Certain Circumstances Be Protective in an Epidemiological Sense
Source: PLOS journal article supplement (doi:10.1371/journal.pone.0132150), 2015-07-10

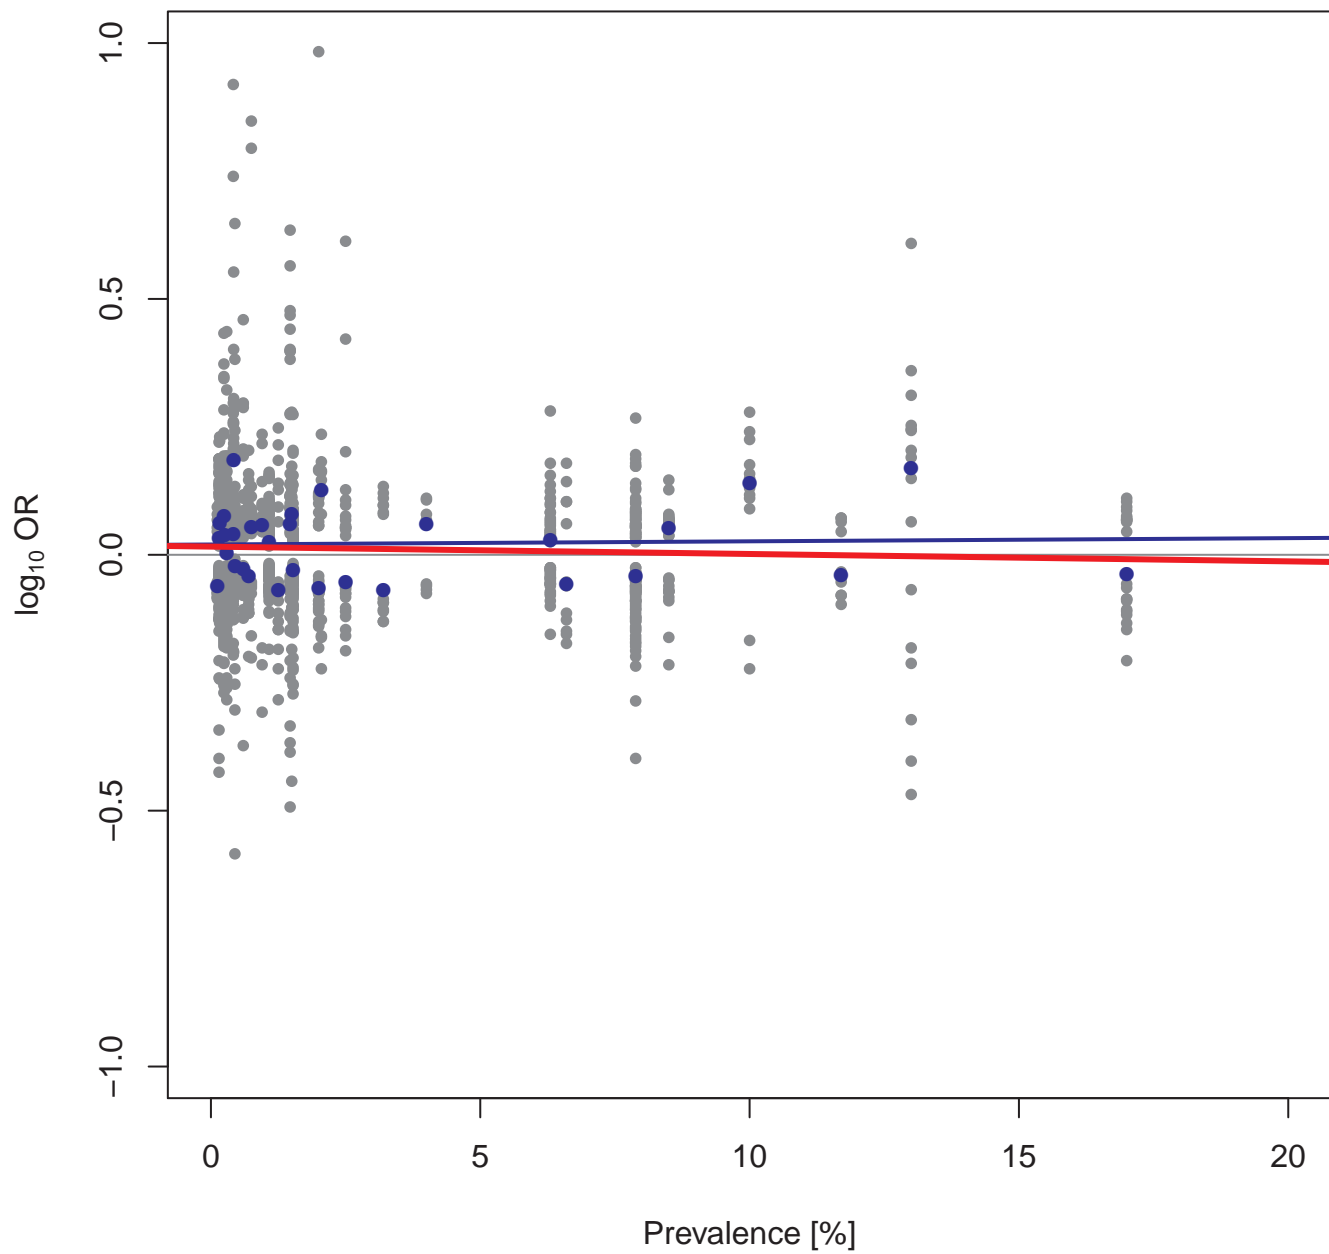

Supplement: S5 (10.1371/journal.pone.0132150.s005) [file journal.pone.0132150.s005]
